# Supplementary material for: Differential Accumulation of Metabolites and Transcripts Related to Flavonoid, Styrylpyrone, and Galactolipid Biosynthesis in Equisetum Species and Tissue Types
Source: MDPI journal article supplement (doi:10.3390/metabo12050403), 2022-04-29
Supplement: s1 [file s1]

## Supplementary Figure S1

Parrish et al. (2022), Metabolites

Translated peptide sequence alignment for selected monogalactosyldiacylglycerol synthases (MGDs) and digalactosyldiacylglycerol synthases (DGDs). Species abbreviations: A.t., *Arabidopsis thaliana*; E.a., *Equisetum arvense*; E.h., *Equisetum hyemale*; E.t., *Equisetum telmateia*.

|          |                                                                |     |
|----------|----------------------------------------------------------------|-----|
| A.t.MGD2 | -----                                                          | 0   |
| A.t.MGD1 | -----                                                          | 0   |
| E.t.MGD  | -----                                                          | 0   |
| E.h.MGD  | -----                                                          | 0   |
| A.t.DGD1 | MVKETLIPSSSTMTGTSSSSSLMTLSSTNALSFLSKGWREVWDSADADLQIMRDRAN      | 60  |
| A.t.DGD2 | -----                                                          | 0   |
| E.h.DGD  | -----MAP-----RGTDSHTTIPASAEKALSLISKSWFDVRKSANEDVKRMKDRAI       | 46  |
| E.a.DGD  | -----MAP-----WATDSHTTIPASAEKALSLISKSWFDVRKSANEDVKRMKDCAI       | 46  |
|          |                                                                |     |
| A.t.MGD2 | -----                                                          | 0   |
| A.t.MGD1 | -----                                                          | 0   |
| E.t.MGD  | -----                                                          | 0   |
| E.h.MGD  | -----                                                          | 0   |
| A.t.DGD1 | SVKNLASTFDREIENFLNNSARSAFP-----VGSPSASS--FSNEIGIMKKLQ          | 106 |
| A.t.DGD2 | -----                                                          | 0   |
| E.h.DGD  | SFSDLANSFDRELENFRKSSSLKIANNSSIAERFLQKFQNGETLLPSLSVSVPEEVNNKLR  | 106 |
| E.a.DGD  | SFSDLANSFDRELENFRKSSSLKIANNASIAERFLQKFQNGGTLPLSLNVSVPPEEVNNKLR | 106 |
|          |                                                                |     |
| A.t.MGD2 | -----                                                          | 0   |
| A.t.MGD1 | -----MQ--NPSTV--TQESA-----AP-----VF-D                          | 17  |
| E.t.MGD  | -----RVCGRGER-----ERMQ--RPSDA--LPQHS-----IPFTSAGDLEAPLIID      | 38  |
| E.h.MGD  | -----                                                          | 0   |
| A.t.DGD1 | PKISEFRRVYSAPEISRK--VMERWGPAPARAKLGMDSLAIKKAIVSEMELDE--RQGV    | 160 |
| A.t.DGD2 | -----                                                          | 0   |
| E.h.DGD  | ISFSGFSRSYSNPEFVKRRADFLHKWAPSKK--LDVSLIKKVLSPRIDEEDFYIKTGSE    | 163 |
| E.a.DGD  | ISFSGFSRSYSNPDFVKRQADFIHKWAPSKK--LDVSLIKKVLSPRIDEEDFYIKTGAE    | 163 |
|          |                                                                |     |
| A.t.MGD2 | -----                                                          | 0   |
| A.t.MGD1 | FFPRLR-GLTSRNRSPCSNSDGYA-----LSSSNALYF                         | 49  |
| E.t.MGD  | HSCFLGGGGEASAGRPCVGDYSGR-----PRSVVVCCL                         | 71  |
| E.h.MGD  | -----VGPIYGGP-----PRGVVHCL                                     | 16  |
| A.t.DGD1 | EMSRL-----RRRRNSDRVRFTEFF-----AEAERDGEAYFGDWEPIRSLKSRF-        | 204 |
| A.t.DGD2 | -----                                                          | 0   |
| E.h.DGD  | VISSGKGHHGNHRNHTQRLVVKSWDKDNKNTKNEG-DGQGSILTQEWELLRRFKESWW     | 222 |
| E.a.DGD  | IISGKGHHGNCQNNCSQRVVVKSANNKHTKNEGDDGRGNLTQEWELLRRFKESWW        | 223 |
|          |                                                                |     |
| A.t.MGD2 | -----MATTVMALA-----                                            | 9   |
| A.t.MGD1 | N-----GF-RTLPSRRMGKTLASL---SFNTKSSA--GSSL-----                 | 79  |
| E.t.MGD  | RR-----CRGNAKPKPRPR-AKLILAMSASPWD-----RPPLSP-----              | 104 |
| E.h.MGD  | RR-----CVGNAKPKSFSR-AKAILAMSASPQDGFQFVNRSLSHSP-----            | 56  |
| A.t.DGD1 | KEFE-----KRSSLEILSGFKNSEFVEKLKTSF-KS---IYKETDEAKDVPLDVPPELLA   | 255 |
| A.t.DGD2 | -----                                                          | 0   |
| E.h.DGD  | KDLETTAAVNRSPSDFDNM-RTEVFENIKKNL-RL---TVPRFEDGKDVAPLDVSELLA    | 277 |
| E.a.DGD  | KDLETTAVANKSPSDFDNITKTEIFENLKKNL-RL---TVPRFEDGKDVAPLDVSELLA    | 279 |
|          |                                                                |     |
| A.t.MGD2 | -----EKVLERYGTSKSAVSVTSGDGKETHRTHHHIHKRIKS---YD                | 49  |
| A.t.MGD1 | --RRFISDFNSFIRFHCDKVVPESF-----ASVGGVGLSSDEN---GIREN-G---T      | 122 |
| E.t.MGD  | --PRGGAAFLASLGLRKDELL-----SSLANGDAKDCN---DAEAA-A---PP          | 144 |
| E.h.MGD  | --LRGGTAFLASLGLRQDEF-----SSLANDDIVKDCN---DGEAA-E---PP          | 95  |
| A.t.DGD1 | CLVRQSEPFLDQIGVRKDTCDRIVE-----SLCKCKSQQ-----L---WRLPSAQASD     | 300 |
| A.t.DGD2 | -----                                                          | 0   |
| E.h.DGD  | ILIRQSESWLDHLGLKKDVVERVCD-----MLVKGRHKNKKE-QSHSIFNGNKEALAT     | 329 |
| E.a.DGD  | ILIRQSEPWLDYGLGLKKDVVERVCD-----MLVKGRHKNKKE-QSHSIFNGNKEVLAT    | 331 |

## Supplementary Figure S1 (continued)

Parrish et al. (2022), Metabolites

|                        |                                                               |     |
|------------------------|---------------------------------------------------------------|-----|
| A.t.MGD2               | DIDEDESSLE---LIQI-----GAERTKNVLILMSDTGGGHRA-----              | 84  |
| A.t.MGD1               | GGVLGEEGLP----LNGV-----EADRPKKVLILMSDTGGGHRA-----             | 157 |
| E.t.MGD                | ENMTVDGNAD---GAGV-----VPRRRKTVLILMSDTGGGHRA-----              | 179 |
| E.h.MGD                | ENVAVDENTN---EAGV-----VPRRRKTVLILMSDTGGGHRA-----              | 130 |
| A.t.DGD1               | LIENDNHGVDLDMRIASVLQSTGHHYDGGFWTDFVKPETPENKRHVAIVTTASLPWMTGT  | 360 |
| A.t.DGD2               | -----MTNQEQHIAIFTTASIPWLTGT                                   | 23  |
| E.h.DGD                | VKDTGKSMEELDFRLASVMQSTGYKYNGRTWGGQIKKEVESGMRNIAIFTTASLPWMTGT  | 389 |
| E.a.DGD                | MKDTGKNMEELDFRLASVMQSTGYNYNGRTRGGQSMKDVETGMRNIAIFTTASLPWMTGT  | 391 |
| . :                    |                                                               |     |
| A.t.MGD2               | -SAEAIRDAFKIEFGDKYRVIVKDVWKEYT---GWPL-----NDMERSY             | 124 |
| A.t.MGD1               | -SAEAIRAAFNQEFGDEYQVFITDLWTDHT---PWPf-----NQLPRSY             | 197 |
| E.t.MGD                | -SAEAIKATFQLEFGDEYEVLTDLWKEHT---PWPf-----NQLPRSY              | 219 |
| E.h.MGD                | -SAEAIKATFQLEFGDEYEVLTDLWKEYT---PWPf-----NQLPRSY              | 170 |
| A.t.DGD1               | AVNPLFRAAYLAKAAKQ-SVTLVVPWLCESDQELVYPNNLTFSPEEQESYIRKWLEERI   | 419 |
| A.t.DGD2               | AVNPLFRAAYLANDGER-RVTLVIPWLTTLKHQKLVPNSITFSSPSEQEAYVRQWLEERV  | 82  |
| E.h.DGD                | AVNPLLRAYLAKNGKQ-NVTLLVPWLCKKEQKLVPNNMNFDSPEEQEAYVRNWLESRL    | 448 |
| E.a.DGD                | AVNPLLRAYLAKNGKQ-NVTLLVPWLCKKDQKFVYPNNMTFDSPEEQEGYVRNWLESRL   | 450 |
| : : : : * : * . : *    |                                                               |     |
| A.t.MGD2               | KFMVKHVQLWKVAFHSTSPKWIHSCYLAIAAYAKEVEAGLMEYKPEIIISVHPLMQHI    | 184 |
| A.t.MGD1               | NFLVKHGT LWKMTYYGTSPRIVHQSNAATSTFIAREIAQGLMKYQPDIIISVHPLMQHV  | 257 |
| E.t.MGD                | GFLVKHSTLWKATYHVTAPRIVHRTHFAVTSTFIARKVMQGLLKHKPDVIVSVHPLMQHI  | 279 |
| E.h.MGD                | GFLVRHSTLWKATYHVTAPRIVHRTHFAVTSTFIARKVMQGLLKHKPDVIVSVHPLMQHI  | 230 |
| A.t.DGD1               | GFK---ADFKISFYPGKFSKERRSIF-----PAGDTSQFISSKDADIAILEEPEHLNW    | 469 |
| A.t.DGD2               | SFR---LAFEIRFYPGKFAIDKRSIL-----PVGDISDAIPDEEADIAVLEEPEHLTW    | 132 |
| E.h.DGD                | GFK---SDFKIAFYPGKFSKQKRSIL-----ACGDISQFISDEEADIAVLEEPEHLTW    | 498 |
| E.a.DGD                | GFK---SDFKIAFYPGKFSKQKRSIL-----ACGDISQFVSDQEADIAVLEEPEHLTW    | 500 |
| * : : : : . : . : : *  |                                                               |     |
| A.t.MGD2               | PLWLKQWELQKRVLf---VT---VIT---DLNTCHPTWFHpgVNRcyCPSQE-----     | 228 |
| A.t.MGD1               | PLRVLRSKGLLKKIVf---TT---VIT---DLSTCHPTWFHKLVTRCYCpSTE-----    | 301 |
| E.t.MGD                | PLRILKARGLLKKIPf---TT---VIT---DLSTCHPTWFHRLVTRCFCpTKE-----    | 323 |
| E.h.MGD                | PLRILKARGLLKKIPf---TT---VIT---DLSTCHPTWFHRLVTRCFCpTKE-----    | 274 |
| A.t.DGD1               | YYHGKRWTDKFNHVVGIVHTNYLEYIKREKNGALQAFFVNHVNNWVTRAYCDKVLRLSAA  | 529 |
| A.t.DGD2               | FHHGQKWTKFNYVIGIVHTNYLEYVVKREKQGRVKAFFLKYLNWVVGIVYCHKVIRLSAA  | 192 |
| E.h.DGD                | YFHGKRWTDKFNHVVGIVHTNYLEYVVKREKNGALQAFLLKHVNNWVTRIYCHKVIRLSAA | 558 |
| E.a.DGD                | YFHGKRWTDKFKYVVGIVHTNYLEYVVKREKNGALQAFLLKHVNNWVTRIYCDKVLRLSAA | 560 |
| : : : . : : : * : *    |                                                               |     |
| A.t.MGD2               | -----VAKRALFDGLDESQVRVFGLP-----VRPSFARAVLVKDDLR               | 265 |
| A.t.MGD1               | -----VAKRAQKAGLETSQIKVYGLP-----VRPSFVKPVRPKVELR               | 338 |
| E.t.MGD                | -----VAEKALKAGLKTTQIRVYGLP-----IRPSFCKDIPPKVDLR               | 360 |
| E.h.MGD                | -----VAEKALKAGLKTTQIRVYGLP-----IRPSFCKDIPPKVELR               | 311 |
| A.t.DGD1               | TQDLPKSVVCNVHGVNPKFLMIGEKIAEERSRGEQAFSGAYFLGKMVWAKGYRELIDLm   | 589 |
| A.t.DGD2               | TQEYPKSIVCNVHGVNPKFLEIGLRKLEQQKLQEQPFTKGAYYIGKMVWSKGYKELLKLL  | 252 |
| E.h.DGD                | TQELPRsIVCNVHGVNPKFLEIGEKMAQDGKGSQDTFSKGAYFLGKMVWGKGYRELVDLL  | 618 |
| E.a.DGD                | TQELPRsIVCNVHGVNPKFLEIGEKMVQEGEGSQDTFSKGAYFLGKMVWGKGYRELVDLL  | 620 |
| * : * : : *            |                                                               |     |
| A.t.MGD2               | KELEMDQDLRAVLLMGGGEGMGpVketAKALEEFlyDKENRKPIGQMVICGRNKKLASA   | 325 |
| A.t.MGD1               | RELGMdENLPAVLLMGGGEGMGpIEATARALADALYDKNLGEAVGQVLIICGRNKKLQSK  | 398 |
| E.t.MGD                | RSLGMNEELPAVLLMGGGEGMGpVESTAKALGESLFCQQSGEaIGQLVVICGRNtkLVKN  | 420 |
| E.h.MGD                | RALGMNEELPAVLLMGGGEGMGpVESTAKALGESLFCQQSGEaIGQLVVICGRNMkLVKN  | 371 |
| A.t.DGD1               | AKHKSELGSFNLDVYNGEDAVEVQRAAKKHDLNlnFLKGRDHADdAL-----          | 637 |
| A.t.DGD2               | EKHQKELAELEVDLYGDGEDSEEIKEAARKLDLTvNVYPGRDHADSLF-----         | 300 |
| E.h.DGD                | AKHKSDLGSLKIDVFGTGEDSEEVKATAKKLGldLnFNHQGRDHADdCL-----        | 666 |
| E.a.DGD                | AKHKSDLGSLKIDVFGTGEDSEEVKATAKKLGldLnFNQGRDHADdSL-----         | 668 |
| : : * *. : : * : . . . |                                                               |     |

## Supplementary Figure S1 (continued)

Parrish et al. (2022), Metabolites

|          |                                                              |                 |
|----------|--------------------------------------------------------------|-----------------|
| A.t.MGD2 | LEAIDWKIPVKVRFETQMEKWMGACDCIITKAGPGTIAESLIRSLPIILNDYIPGQKEG  | 385             |
| A.t.MGD1 | LSSLDWKIPVQVKGFITKMEECMGACDCIITKAGPGTIAEAMIRGLPIILNGYIAGQEAG | 458             |
| E.t.MGD  | LQSINWSMPVQIRGFEKNIEEWMGACDCLITKAGPGTIAEAMIRGLPLILSDYIAGQEVG | 480             |
| E.h.MGD  | LQSINWSIPVQIRGFEKNIEEWMGACDCLITKAGPGTIAEAMIRGLPLILSDYIAGQEVG | 431             |
| A.t.DGD1 | -----HKYKVFINPSISDVLC-----TATAEALAMGKFVVCADHPSNEFFR          | 678             |
| A.t.DGD2 | -----HNYKVFLNPSTTDVVC-----TTTAEALAMGKIVVCANHISNKFFK          | 341             |
| E.h.DGD  | -----HGYKVFINPSISDVVC-----TTTAEALAMGKIVVCADHPSNEFFR          | 707             |
| E.a.DGD  | -----HGYKVFINPSISDVVC-----TTTAEALAMGKIVVCADHPSNDFFR          | 709             |
|          | : : : : *                                                    | : **:: . :: :.. |
| A.t.MGD2 | NVPYVVENGAGVFTRSPKETARIVGEWFSTKTDELEQTSNARKLAQPEAVFDIVKDIDE  | 445             |
| A.t.MGD1 | NVPYVVENGCGKFSKSPKEISKIVADWFGPASKELEIMSQNALRLAKPEAVFKIVHDMHE | 518             |
| E.t.MGD  | NVPFVVDNGAGKFLKEPKKIAQTVADWFGPKREELHTMSRNALKLARPDVFKIVHDLDR  | 540             |
| E.h.MGD  | NVPFVVDNGAGKFLKEPKKIAQTVADWFGPKREELHMSRNALKLARPDVFKIVHDLDR   | 491             |
| A.t.DGD1 | SFPN-----CLTYKTS-EDFVSKVQEAMTKEPLPLTPEQMYNLSWEAATQRFMEYSDDLK | 732             |
| A.t.DGD2 | QFPN-----CRTYDDG-QGFVRATLKALGEQPSQLTEQQRHELSEWEAATQRFKIVSDLN | 395             |
| E.h.DGD  | SFPN-----CLTYKDS-REFVEKVKEAMADPAPLTLEQRHLLSWEAATERFIEYAEIDK  | 761             |
| E.a.DGD  | SFPN-----CLTYKDS-REFVEKVKEAMDIDPVPLTPEQRHLLSWEAATERFIEYAEIDK | 763             |
|          | ..* . : . . . : *                                            | . * :..         |
| A.t.MGD2 | LSEQRGRL-----ASVSYNLTSSF--ASLV-----                          | 468             |
| A.t.MGD1 | LVRKKNSL-----PQLSCTA-----                                    | 533             |
| E.t.MGD  | LARRKVFL-----EENRTLVP-----                                   | 557             |
| E.h.MGD  | LARRKVFL-----EENRTLVP-----                                   | 508             |
| A.t.DGD1 | ILNNGEGG-----RKMRKRSRSPFNEVDGGLAFSHYVLTGNDFLRLCTGATPR        | 782             |
| A.t.DGD2 | LSRADSN--LSKRVSFASSISV-----GKNLEDMSAYIHFLASGFASRTAFGAIPG     | 446             |
| E.h.DGD  | PFIKQGGESVTPEKVVQKKAMALSMAMPNPFELVDNSLAAAHYCLTGIEAARFISGALPG | 821             |
| E.a.DGD  | PFIKQGGESVTPEKVVQKKAMALSMAMPNPFELVDNSLAAAHYCLTGIEAARLISGALPG | 823             |
| A.t.MGD2 | -----                                                        | 468             |
| A.t.MGD1 | -----                                                        | 533             |
| E.t.MGD  | -----                                                        | 557             |
| E.h.MGD  | -----                                                        | 508             |
| A.t.DGD1 | TKDYDNQHCKDLNLVP--PHVHKPIFGW                                 | 808             |
| A.t.DGD2 | SLQPDEELCRDLGLSLNTPSPNTRKQD-                                 | 473             |
| E.h.DGD  | SINYDSQHSKDLHLQP--PSVEKPVYGW                                 | 847             |
| E.a.DGD  | SSNYDSQHSKDLHLQP--PSVERPVYGW                                 | 849             |

## Supplementary Figure S1 (continued)

Parrish et al. (2022), Metabolites

Translated peptide sequence alignment for a styrylpyrone synthase (SPS), a p-coumaroyltriatic acid synthase (CTAS), selected chalcone synthases (CHSs), and a contig of transcriptome data for Equisetum telmateia (DN52675). Species abbreviations: C.p., Cyclosorus parasiticus; E.a., Equisetum arvense; E.h., Equisetum hyemale; E.t., Equisetum telmateia; P.M., Piper methysticum.

|             |                                                                |     |
|-------------|----------------------------------------------------------------|-----|
| P.m.SPS     | -----MSKTVEDRAAQRAGPATVLAIGTATPANVVYQTDYPDYFRVTKSEHMTKLKN      | 54  |
| E.h.CTAS    | -----PLTAYEQANYPDFYFGITNSNHMTDLKE                              | 28  |
| E.t.DN52675 | -----                                                          | 0   |
| C.p.CHS     | MPVPNGATFPPCARKMERADGPATVLAIGTANPPNVFDQSTYPDFYFNITNSNHMTDLKT   | 60  |
| E.a.CHS     | MTVLEESADASSRRLAQRANGPATVLAIGTANPANVFEQSSYPDFYFDITNSQHMTLKL    | 60  |
|             |                                                                |     |
| P.m.SPS     | KFQRMCDRSTIKKRYMVLTEELLEKNLSLCTYMEPSLDARQDILVPEVPKLGKEAADEAI   | 114 |
| E.h.CTAS    | KFSRMCEKSGIKKRYLHLTEELKANPSCGYWEKSLDVRQDIVVVEVPMLARQASIKAI     | 88  |
| E.t.DN52675 | -----VVVEVPKLAKEASLKVI                                         | 17  |
| C.p.CHS     | KFQRMCDKSGITKRYMYLNEEILKANPNMCAYWEKSLDVRQDMVVVEVPKLGKEAATKAI   | 120 |
| E.a.CHS     | KFSRMCKSGIKKRYMHLNSEILKANPSLCAYWEKSLDVRQDIATVVEVPKLGKEASLKAI   | 120 |
|             | * ** * .:.*: .:*                                               |     |
|             |                                                                |     |
| P.m.SPS     | AEWGRPKSEITHLIFCTTCGVDMPGADYQLTKLLGLRSSVRRTMLYQQGCFGGGTVLRRLA  | 174 |
| E.h.CTAS    | KEWGQPKSKITHLVFCTTNGLDMPGADWKLTKLLGLHPNVKRLMIYQQGCFAGGTVMRIA   | 148 |
| E.t.DN52675 | KEWGQPKSKITHLIFCSTSGVDIPGADWQLTKILGLCPSVKRLMMYQQGCFAGGTVLRRIA  | 77  |
| C.p.CHS     | KEWGQPKSKITHVVFCTTSGVDMPGADWALTLLGLRPSVKRLMMYQQGCFAGGTVMRVA    | 180 |
| E.a.CHS     | KEWGQPKSKITHLVFCTTSGVDMPGADWALTLLGLRPSVKRLMMYQQGCFAGGTVLRVA    | 180 |
|             | ***:***:***:.*:* *.:*:*:*: ***:*** .*: * *:*****.***:.*:       |     |
|             |                                                                |     |
| P.m.SPS     | KDLAENNAGARVLVVCSEITTAVERNFRGPSDTHLDLLVGLALFGDGAAAVIVGADPDPTLE | 234 |
| E.h.CTAS    | KDLAENNKDARVLVVCSEIN-LSTFRGPSDIHLDSLVGQALIGDGASAMIGSDPIPKVE    | 207 |
| E.t.DN52675 | KDLAENNKDARVLVVCSEIT-VVTFRGPSETNFANLVGQALFGDGVSAVIGSDPIQVE     | 136 |
| C.p.CHS     | KDLAENNKGARVLVVCSELT-AVTFRGPSETHLDSLVGQALFGDGASAIIVGADPIPEVE   | 239 |
| E.a.CHS     | KDVAENNKGARVLVVCSEIT-CVTFRGPSETHLDSLVGQALFGDGAAAVILGSDPLPE-E   | 238 |
|             | **:*:* * .*****: . *****: : * ** *:*:*:*:*:*:* * *             |     |
|             |                                                                |     |
| P.m.SPS     | RPLFQIVSGAQTIIPDSEGAINGHLREVGLTIRLLKDVPLVSMNIEKCLMEAFAPM---    | 291 |
| E.h.CTAS    | TPWFELHWSGSTILPESNGAIDGHLREVGLIFHLSKDVPRIISKNIQVLLTDAFEKAFL-   | 266 |
| E.t.DN52675 | TPWFELHWSGSTILPDSGDAIDGHLREVGLTFHLREDVPRIISKNIQVVLNDAFDKVPF-   | 195 |
| C.p.CHS     | RPWFELHWSGSTILPDSGDAIDGHLREVGLTFHLMKDVPPIISKNIQVTLKDAFEKVF-    | 298 |
| E.a.CHS     | NPCFELHWSGSNILPDSGDAIDGHLREVGLTFHLMKDVPPIISKNIQVVLNDAFRSAFDE   | 298 |
|             | * *: : ...***:.*:*:*:*:*:*:*: :* :*** :*: * * * :*             |     |
|             |                                                                |     |
| P.m.SPS     | -----GIHDWNSIFWIAHPGGPTILDQVEAKLGLKEEKLKSTRAVLREYGNMSSACVLF    | 345 |
| E.h.CTAS    | --GGKEAPPSYNDVFWIAHPGGPAILDQIEAKLQLKMEKMHASRSILSEYGNMSSASVIF   | 324 |
| E.t.DN52675 | --SGEGAPLSYNDVFWIAHPGGPAILDQIEEKLKLIPIKKMQASRAILYEGNMSSASVFF   | 253 |
| C.p.CHS     | --NEEGEVPSYNDVFWIAHPGGPAILDQVEQKLQKTEKMAASRQVLSYGNMSSACVLF     | 356 |
| E.a.CHS     | SGNAEDRPASVNDIFWIAHPGGPAILDQVEEKMMLAPEKMRATRDVLSEYGNMSSACVLF   | 358 |
|             | . *.:*****:***:* * * :*: :*: * :*****.*:*                      |     |
|             |                                                                |     |
| P.m.SPS     | ILDEVKRKSMEEGKTTTGEGLDWGVLFVFGPGFTVETVVLHSMPIPKADEGR           | 397 |
| E.h.CTAS    | IMDYMRQQAWEKKLATTEGLDWGVLLGFGPGLTVETILLKSVNLN-----             | 371 |
| E.t.DN52675 | IMDYLRKQSLENKLPTTGDGFDWGLLLGFGPGLTITETIVLKSVPINN-----          | 300 |
| C.p.CHS     | IMDHLRKKSVEQKLATSGEGYEWGLLLGFGPGLTCTETVVLRSVPLATE----          | 404 |
| E.a.CHS     | IMDHMRMSAQNKLTTEGLDWGVLLGFGPGLTETVVLKSIRLAC-----               | 405 |
|             | *:* *: : : : *:*:* :***:***:* *:*:*:*: *                       |     |

## Supplementary Figure S1 (continued)

Parrish et al. (2022), Metabolites

Translated peptide sequence alignment for phenylalanine ammonia lyases (PALs). Species abbreviations: E.a., Equisetum arvense; P.a., Pteridium aquilinum; P.e., Peltia epiphylla; 56P.n., Psilotum nudum.

|          |                                                                       |     |
|----------|-----------------------------------------------------------------------|-----|
| P.e. PAL | -----RLHGKNNLFVD--GPVAKPPHWAKAAEALQTSHYEEVR                           | 36  |
| E.a. PAL | MAAEFQNKQLAELHRPPTLPLPVQGNPLFVDSKEPVAKPPHWQKAAEALQSSHYEEIR            | 60  |
| P.a. PAL | -----GGSFLLDDIK                                                       | 9   |
| P.n. PAL | MTADLVLPVLGIGSKPLGLAHTVCGRLLP---HKSEGDLKLVESAQSECSHLDDEV              |     |
|          | *. :. :.                                                              |     |
| P.e. PAL | RMIRQFYESEKVLGRSSSLTVGQVTAQTQRASVIVQLDEAEAKSRVDESSNWVLNRTLTG          | 96  |
| E.a. PAL | RMIRQFLETEKVVVLQGSSTLVGQVTAQTQRSEVAVELDEATAKARVDESSNWVLNNILKG         | 120 |
| P.a. PAL | QMISTFTAEEELKIEGKTLTVAEVAFAFARKSEKVLCLDEAAAKQRVDESALWVQNKIMKG         | 69  |
| P.n. PAL | RMVKEFSDGNVVSQGLNLTVAQVAARPDVKVELDSAVARRRVDESSEWVNVHIMKG              | 116 |
|          | :*: * : : .*: .***.:*.:*.: .: : **.* *: *****: ** *. :.*              |     |
| P.e. PAL | TDTYGVTTGFGATSHRRTNQVVDLQRELIRFLNAGVIGR-DSDGCSLPLKYARAAMLVRT          | 155 |
| E.a. PAL | TDTYGVTTGFGATSHRRTTQAHDQLRELIRFLNAGVITAGKGANCTLPLPYAKAAMLVRT          | 180 |
| P.a. PAL | CDVYGVTTGFGATSHRRTNQGIIDLQRELIRFLNAGIFG--KSQANALPLDARAAMLVRT          | 127 |
| P.n. PAL | TDTYGVTTGFGATSHRRTNQGIELQKELIRFLNAGILTGDKEECNSLPTPAVRAAILVRT          | 176 |
|          | *.*****:*****.* :*:*****.: . :** .:***:***                            |     |
| P.e. PAL | NTLMQGYSGIRWDILDAMRKLMCANVPIKPLPLRGTTITASGDLVPLSYIAGLLTGRSNSKA        | 215 |
| E.a. PAL | NTLMQGYSGIRWAILNGFEKLMNGNIIPKMPPLRGTTITASGDLVPLSYIAGLLTARENSRA        | 240 |
| P.a. PAL | NTLMQGYSGIRWEILQTIKLLNANITPLPLPLRGTTITASGDLVPLSYLAGVLTGRPNska         | 187 |
| P.n. PAL | NTLMQGYSGIRWAILLEAMEKLLNSQITPRPLPLRGTTITASGDLVPLSYIAGLLTARENSRA       | 236 |
|          | *****:***** **: :.***: .: : * :*****:*****:***:*. * **:*              |     |
| P.e. PAL | ITPEGKEVSAAEALKIAGIDGPFELQPKLGLVNGTSGAAVAANVCFDANVLALLSEV             | 275 |
| E.a. PAL | ITPSGEEIPAAEALKLVGIEEPFVLQPKLGLVNGTSGAAVAANVCFDANVLALLAEV             | 300 |
| P.a. PAL | VTAEGKVVSAGAEALKMVGVEKPFELQPKLGLVNGTAVGAGLASMVCDAHILALLSVV            | 247 |
| P.n. PAL | VTAEGKEVTGEEALKLAGIQEPFDLQPKLGLVNGTAVGAGLAHVVCYDANIFALLAEV            | 296 |
|          | :* .*: : . *****:***: ** *****:*****:***:***:***: *                   |     |
| P.e. PAL | LSAFFCEVMQKGKPEFTDPLTHQLKHHPGQIEAAAVMEFLLEGSSYMKAALKHETDPLSK          | 335 |
| E.a. PAL | ISALFCEVMQKGKPEFTDPLTHQLKHHPGQIEAAAVMEYLLLEGSSYMQAALKHETDPLSK         | 360 |
| P.a. PAL | TSAMFCEVMQKGKPEFTDPLTHRLKHHPGQIEAAAVMEYLLLEGSSALVKAASKLHGVDAKK        | 307 |
| P.n. PAL | LSALFCEVMQKGKPEFTDHLTHRLKHHPGQIEAAAVMEWLLDGSSYMKAALKHETDPLKK          | 356 |
|          | **:****** **:****** **:****** **:******:***:***:***:***:***: *        |     |
| P.e. PAL | PKQDRYALRTSPQWLGPQIEVIRSATHSIEREINSVNDNPLIDVSRDMALHGGNFQGTPI          | 395 |
| E.a. PAL | PKQDRYALRTSPQWLGPQAEVIRAAATHCIEREINSVNDNPLIDVSRDMALHGGNFQGTPI         | 420 |
| P.a. PAL | PKQDRYALRTSPQWLGPQIEVIRFATQLIQREINSVNDNPLIDVSRDLALHGGNFQGTPI          | 367 |
| P.n. PAL | PKQDRYALRTSPQWLGPQIEVIRLATHAIQREINSVNDNPLIDVARDKALHGGNFQGTPI          | 416 |
|          | *****:***** **:* **:* **:* **:* **:* **:* **:* **:* **:* **:* **:*    |     |
| P.e. PAL | GVSMNDMRLAIAIGKLMFAQFSELVCDYNSGLPSNLSGGPNPSLDYGFKGAEIAMAAY            | 455 |
| E.a. PAL | GVSMNDMRLAIAIGKLMFAQFSELVCDHYNSGLPSNLSGGPNPSLDYGFKGAEIAMAAY           | 480 |
| P.a. PAL | GTAMDNIRLALAAIGKLMFAQFSELVNDYFNNGLPSNLSAGPNPSLDYGLKGGEIAMASY          | 427 |
| P.n. PAL | GVSMNDMRLAIAIAIGKLMFAQFSELVNDLYNGLPSNLSGSPNPSLDYGFKGAEIALASY          | 476 |
|          | *.:***:*.*:***** **:****** **:****** **:******:***:***:***:***:***: * |     |
| P.e. PAL | CSELQYLANPVTTHVQSAEQHNQDVNSLGLIAARKTAEAEIILKLMSSTYMVALCQAVDL          | 515 |
| E.a. PAL | CSELQYLANPVTTHVQSAEQHNQDVNSLGLISARKTAEAEIILKLMSASYLVALCQAVDL          | 540 |
| P.a. PAL | TSELYLANPVTNHVQSAEQHNQDVNSLGLISARKTAEAEVVLKMCATYLVGICQAVDL            | 487 |
| P.n. PAL | TSEMQYLANPVTTHVQSAEQHNQDVNSLGLISARKTAEADILKLMIISTYIVALCQAVDL          | 536 |
|          | **:*:*****.* *****:***** **:*:***** :*:*.:***:***:***:***: *          |     |
| P.e. PAL | RHLEENMQAVVKRLVESATKSTLYTENG-SLFPTRFSEKDLLQVVDHQPVFSYIDNASNP          | 574 |
| E.a. PAL | RHLEENMQAIVKHVVKVKKSLYNVEGESLLPWAGAEKELLSIIDHQPVFSYIDNASNP            | 600 |
| P.a. PAL | RHLEENLQAAVKQVVSQAAKKTLTGGNGVLLAARFCEKDLLQVVDNEHVFTYADDPVSP           | 547 |
| P.n. PAL | RHLEENMKAIAKHMVCQVARRTLYFDHNGLLPSRFCEKELLHVVEHEPIFLYIDNASNP           | 596 |
|          | *****:*. :*:*. :*. :*. :*. :*. :*. :*. :*. :*. :*. :*. :*. :*. :*. :* |     |

## Supplementary Figure S1 (continued)

Parrish et al. (2022), Metabolites

|         |                                                                                                                                                                               |     |
|---------|-------------------------------------------------------------------------------------------------------------------------------------------------------------------------------|-----|
| P.e.PAL | SYALMLQLREVLVEQALKTPQDEDC-----KEVTPLFTTIPKFEAELKKLLDAEVPKARD                                                                                                                  | 629 |
| E.a.PAL | DYALMLQLRQILVEQTFKVPADSEDESGANSQMPVLFNAIPVFEQALKEALDKEIPKARE                                                                                                                  | 660 |
| P.a.PAL | GYPLMQRLRQVLVEHAIKNPSNERD--EAT----SVMTRIPLFEDELHSQLPaelVNVRA                                                                                                                  | 601 |
| P.n.PAL | ASILMQKLKRLVLDQAMKNVEKEKEKLGAA---STLNRILLFEEELKNLFDSEIPRARE                                                                                                                   | 652 |
|         | <div> <div> <div>**</div> <div>: ** : ** : ** : ** : *</div> </div> <div> <div>..</div> <div></div> </div> <div> <div>: .</div> <div>* ** * : . : * : . *</div> </div> </div> |     |
| P.e.PAL | RYDGGDYAVPNRIKNCRTYPIYKFVRGELGTELLRGTATKSPGEDIEKVFTAILDGKLLL                                                                                                                  | 689 |
| E.a.PAL | SYDSGDFAVPNRINNCRTYPLYKFVRSELGTNLLRGTAPRSPGEDIEKVFNIMEGKLAI                                                                                                                   | 720 |
| P.a.PAL | SFDKGCPIASKVEECRSFPLYQFVRAQLGTQLLAGTRNQSPGQDFEVVFDAlSDGLLMC                                                                                                                   | 661 |
| P.n.PAL | RFDRGQFAVLNRIQNCRTYPLYRFVRDDLGTQLLSGTQTHSPGQDFQKVLDAISEGKLVA                                                                                                                  | 712 |
|         | <div> <div>: *</div> <div>*</div> <div>:</div> <div>: . : : : ** : * : * * : * * : * * : * * : * * : *</div> </div>                                                           |     |
| P.e.PAL | PLLKCLEGWGRGSAGPFTPRTPV---ASPAAYNPAYWAWFDNVRSPSAT-AGKGYWSLTG-                                                                                                                 | 744 |
| E.a.PAL | PLLRCLEGWGRGSAGPFTPRPVP---ASPAAFNPAYWAWFDNIRSPAAM-AGKGSWSSSAF                                                                                                                 | 776 |
| P.a.PAL | PLLQCLEGWTSQSPITTC-----                                                                                                                                                       | 678 |
| P.n.PAL | PLLKCIEGWSGHPGPFSC TQQQESADIEMCNPSSWIWFDQLHCFKAQGGGKGYFMLSVM                                                                                                                  | 772 |
|         | *** : * : ***                                                                                                                                                                 |     |
| P.e.PAL | -- 744                                                                                                                                                                        |     |
| E.a.PAL | GM 778                                                                                                                                                                        |     |
| P.a.PAL | -- 678                                                                                                                                                                        |     |
| P.n.PAL | -- 772                                                                                                                                                                        |     |
